# Supplementary figures and images for: Molecular Characterization of Whole-Genome SARS-CoV-2 from the First Suspected Cases of the XE Variant in the Lazio Region, Italy
Source: MDPI journal article supplement (doi:10.3390/diagnostics12092219), 2022-09-14

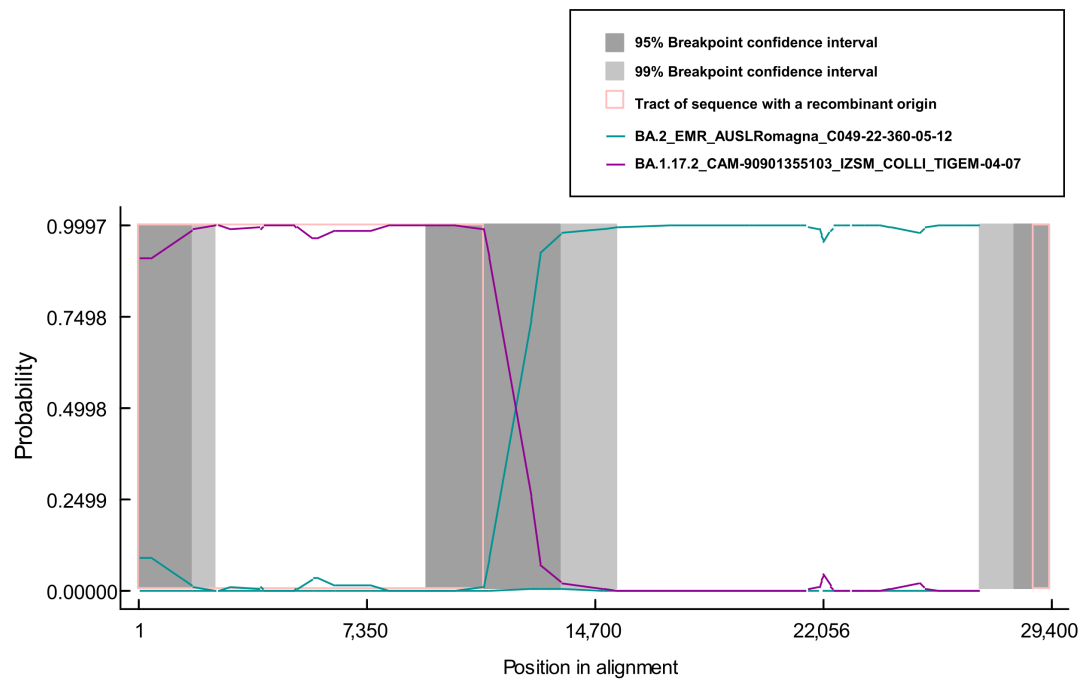

**Figure S1.** RDP4 recombination plot.

Supplement: s1 [file s1]
